# Supplementary material
Source: Springer Nature journal article supplement (https://www.springermedizin.de/resource/supplementary/13223_2012_355_MOESM2_ESM.pdf/9597660)

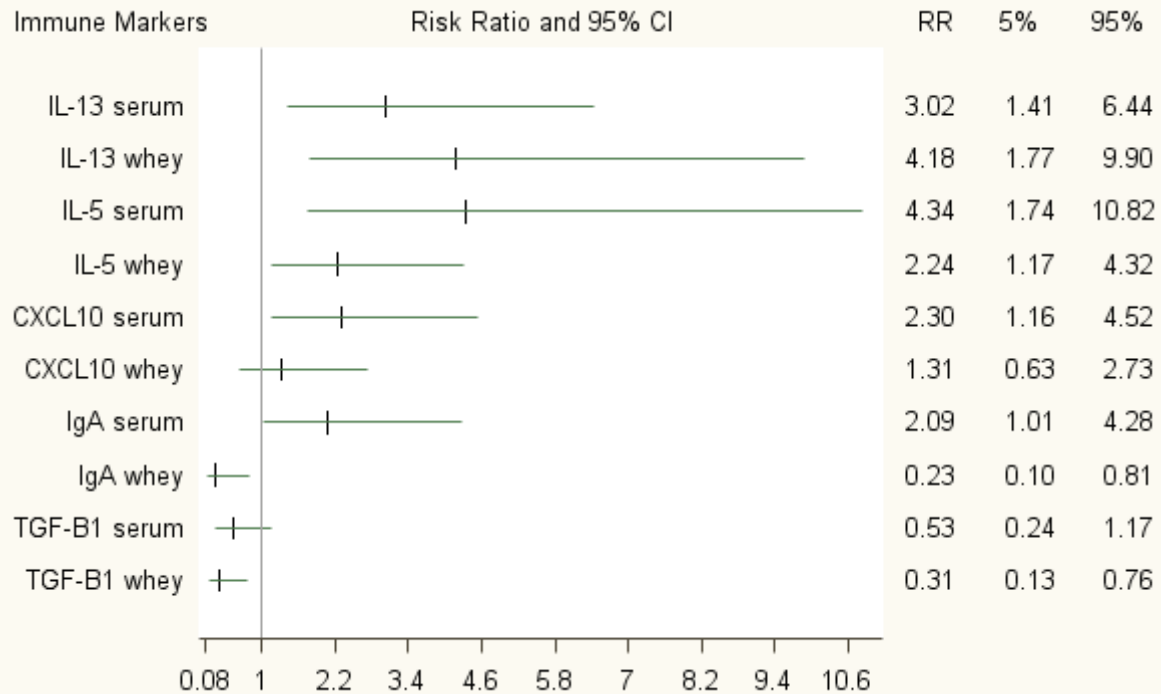

Supplement: MOESM2 [file 9597660]
